# Supplementary material for: Probing the variability in oxidation states of magnetite nanoparticles by single-particle spectroscopy
Source: Royal Society of Chemistry journal article supplement (doi:10.1039/c7tc03010j), 2018-01-01
Supplement: c7tc03010j1.pdf [file c7tc03010j1.pdf]

## ***Supporting Information***

### **Probing the variability in oxidation states of magnetite nanoparticles by single-particle spectroscopy**

A. Fraile Rodríguez, C. Moya, M. Escoda-Torroella, A. Romero, A. Labarta, and  
X. Batlle

*Departament de Física de la Matèria Condensada, Universitat de Barcelona, 08028 Barcelona,  
Spain*

*Institute of Nanoscience and Nanotechnology (IN2UB), Universitat de Barcelona*

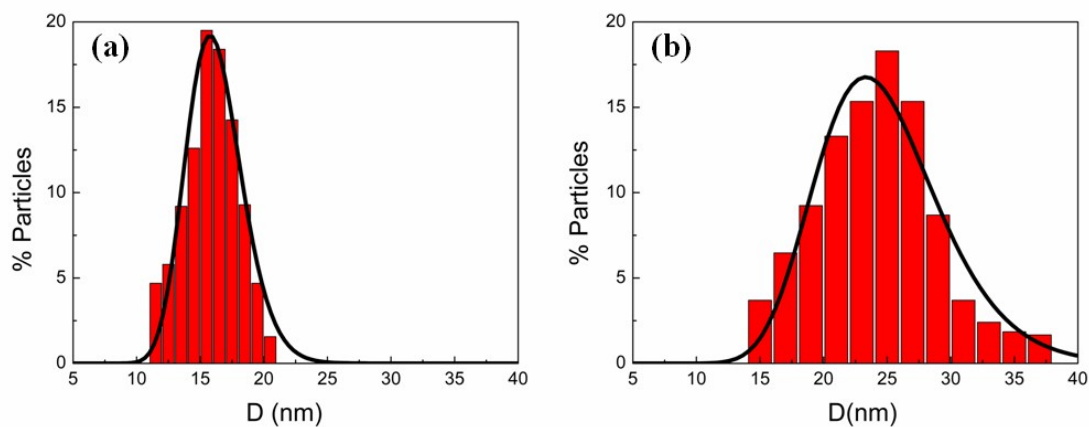

**Figure S1.** Particle size-distribution for  $\text{Fe}_3\text{O}_4$  NP. (a) Sample S1, (b) Sample S2.

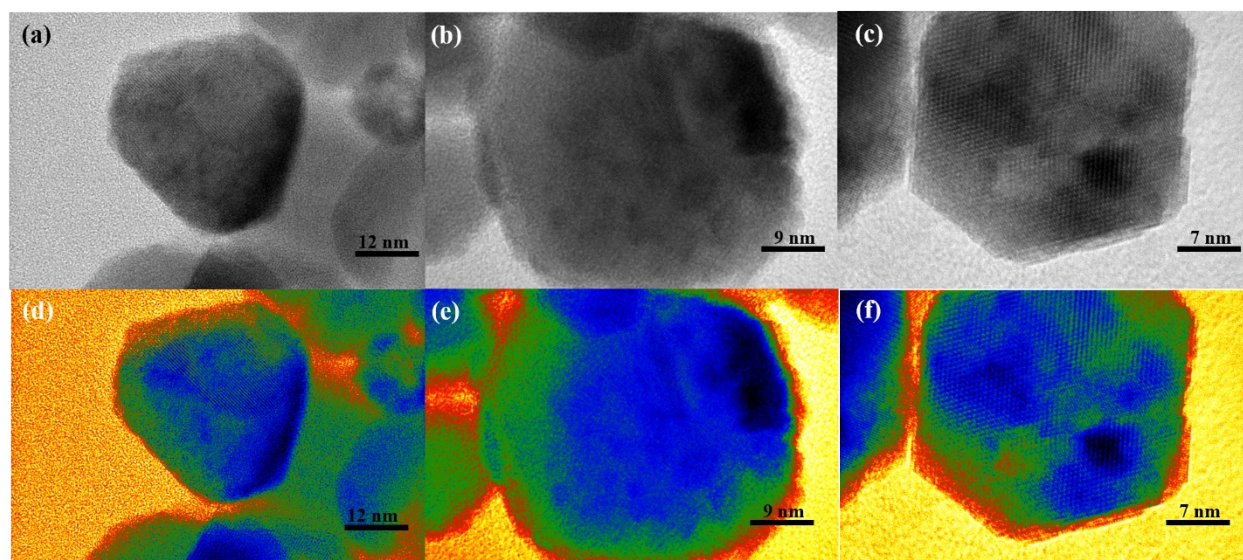

**Figure S2.** Sample S2 (a)-(c) Gallery of HRTEM images. (d)-(f) The crystallographic domains are outlined with a color contrast.

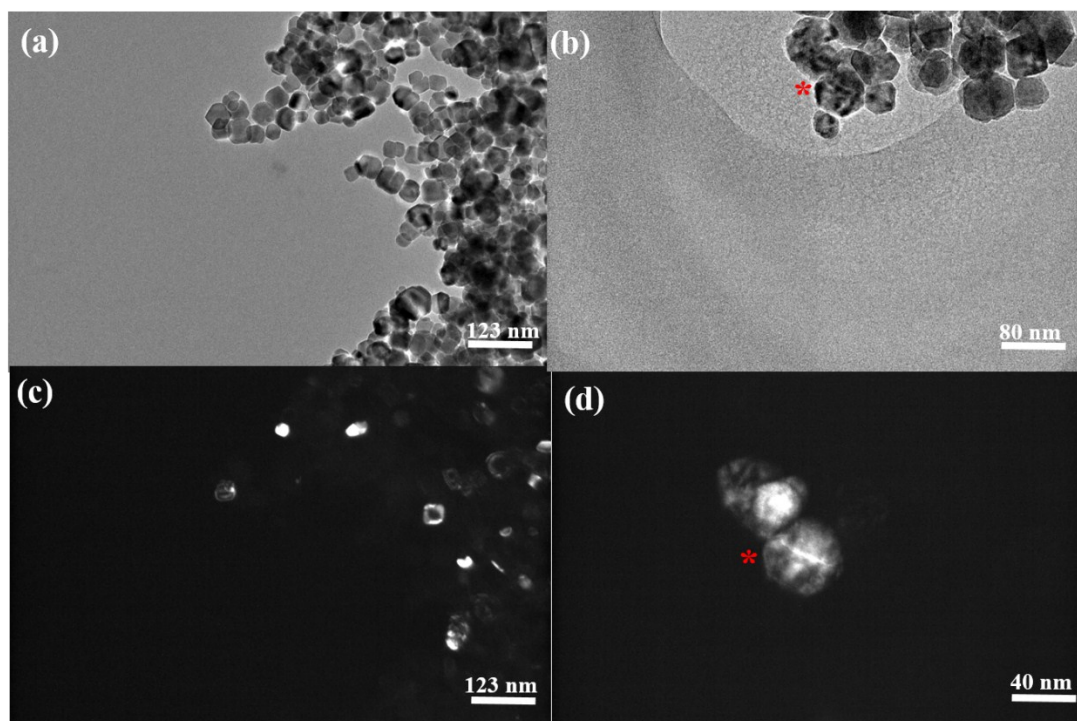

**Figure S3.** Sample S2. (a)-(b) Low resolution TEM. (c)-(d) Dark field images show NP with structural defects and or/different Fe bases suggested by the different contrast appearing inside the particles.

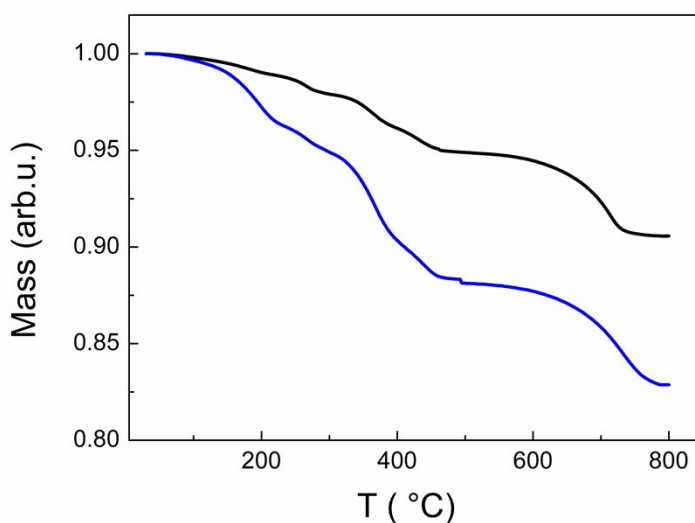

**Figure S4.** The thermogravimetric (TGA) curves of samples S1 (black line) and S2 (blue line) show the typical two weight-loss plateaus between 200-400 °C and 500-750 °C, that correspond to the removal of both the free oleic acid present in the samples and that attached to the surface of the NP, respectively. The slight weight-loss below 200 °C is attributed to the evaporation of adsorbed water molecules. The total weight-loss is about 9% (S1) and 18% (S2).

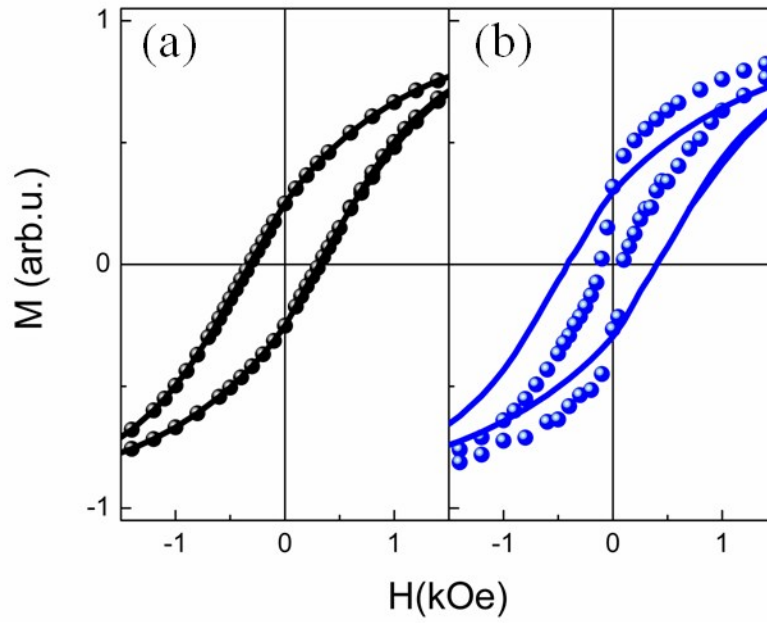

**Figure S5.** Comparison between the hysteresis loops measured at 5 K before and after field cooling (FC) the samples. Curves are as follows: hysteresis loops before FC for S1 (solid black line) and S2 (solid blue line); and the corresponding hysteresis loops after FC at 10 kOe for S1 (black spheres) and S2 (blue spheres).

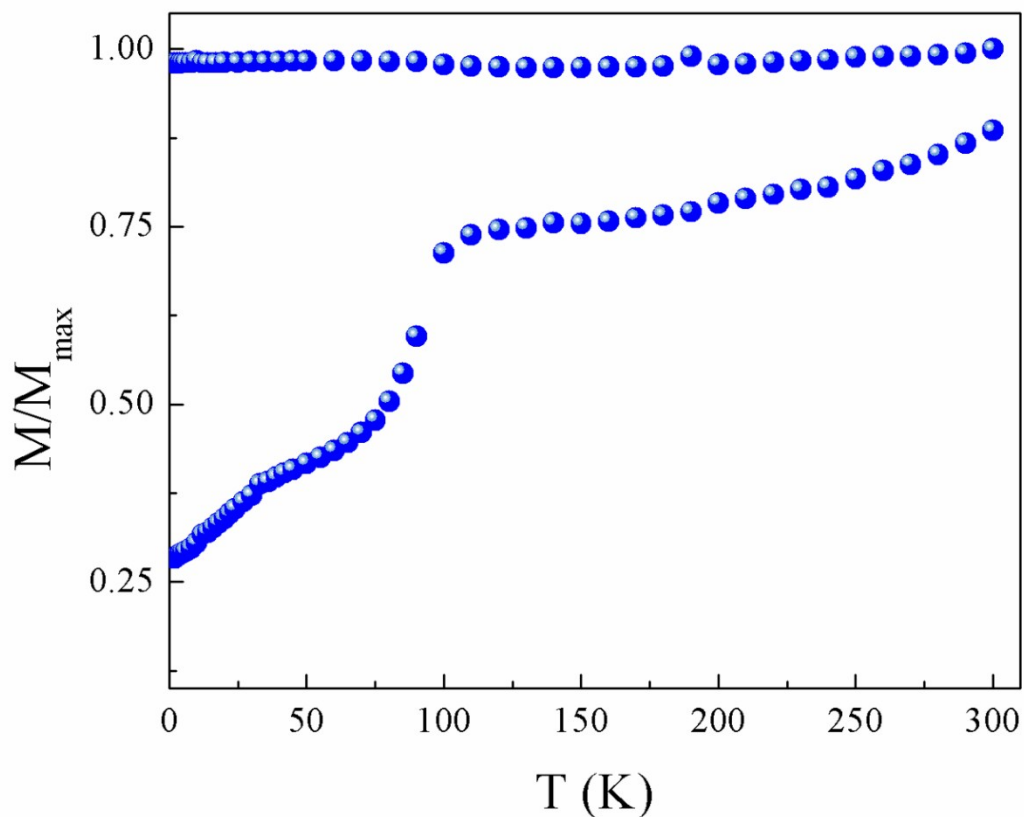

**Figure S6.** Zero field cooled (ZFC) and field cooled (FC) magnetization curves for sample S2 measured with a Quantum Design SQUID magnetometer from 5 to 300 K with a magnetic field of 50 Oe. The  $M_{\text{ZFC-FC}}$  curves show magnetically blocked NP at room temperature. The sharp decrease of the ZFC curve at about 110 K signals de Verwey transition of  $\text{Fe}_3\text{O}_4$  and confirms the stoichiometry of the sample.

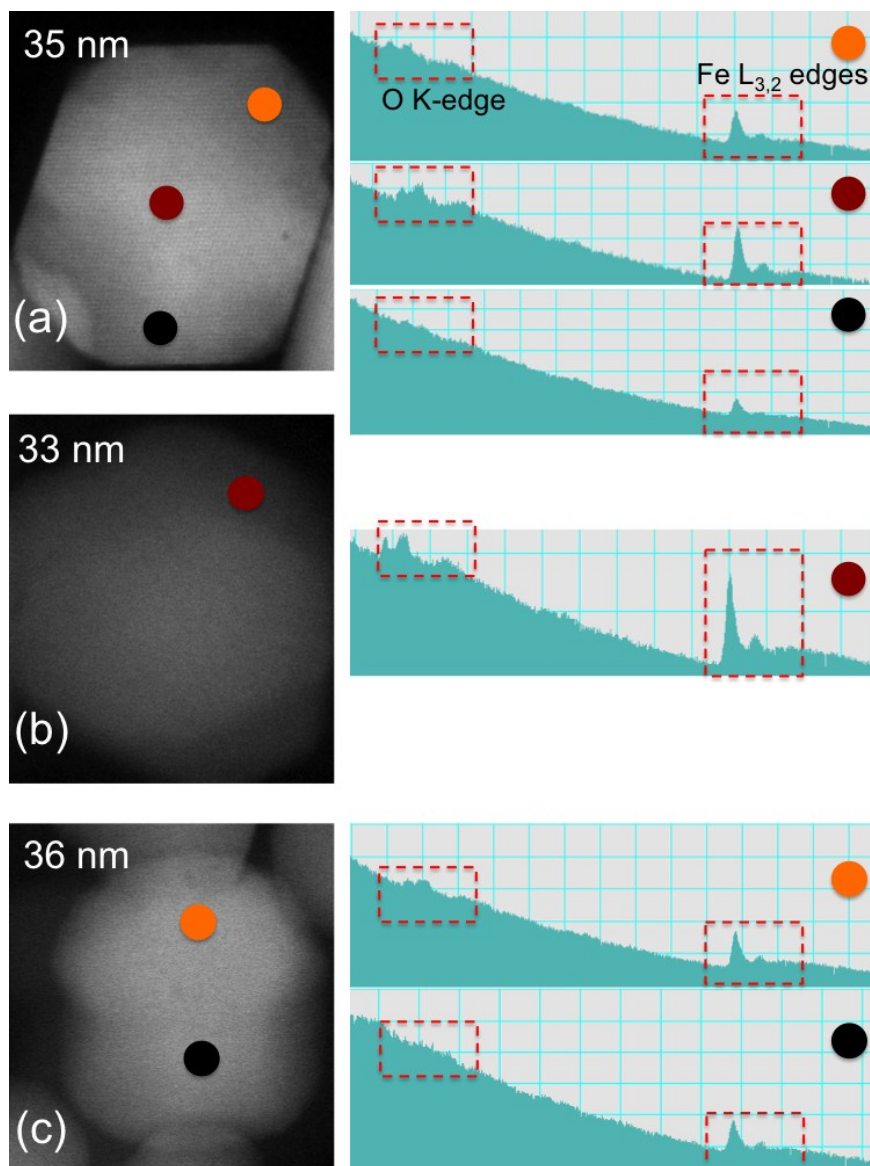

**Figure S7.** High resolution Scanning Transmission Electron Microscopy (STEM) images (left) and Electron Energy Loss Spectroscopy (EELS, right) of nanoparticles from sample S2 with comparable sizes as those studied by X-ray PEEM. Different contrast in the STEM images are indicative of different iron oxide phases. EELS intensity profiles around the O K-edge and Fe  $L_{3,2}$  edges acquired across different locations within the individual nanoparticles confirm that different Fe phases can coexist within the individual particles. Whereas the energy resolution and signal-to-noise ratio are insufficient to distinguish any fine structure in either the  $L_{3,2}$  peak shapes or the O pre-edge peak, so as to identify and quantify the iron oxide species in each case, the quenching of the O K-edge peak is an indicative of over-reduced Fe oxide phases (see particles (a) and (c)).
